# Supplementary material for: Ivermectin for Treatment of Mild-to-Moderate COVID-19 in the Outpatient Setting: A Decentralized, Placebo-controlled, Randomized, Platform Clinical Trial
Source: bioRxiv or medRxiv preprint supplement (doi:10.1101/2022.06.10.22276252), 2022-08-11
Supplement: Supplementary file [file media-1.pdf]

**Online-only Supplement**

**ACTIV-6 Executive Committee..... 2**

**ACTIV-6 Protocol Oversight Committee ..... 2**

**ACTIV-6 Clinical Trial Team..... 3**

**ACTIV-6 Independent Data Monitoring Committee ..... 3**

**ACTIV-6 Clinical Events Classification Committee..... 4**

**ACTIV-6 Data Coordinating Center..... 4**

**ACTIV-6 Primary Site Investigators / Study Coordinators ..... 6**

**COVID-19 Ordinal Outcome Scale ..... 9**

**eTable 1. Baseline symptom prevalence and severity..... 10**

**eTable 2. Adverse events..... 12**

**eFigure 1. Study flow diagram..... 13**

**eFigure 2A. All-cause hospitalization or death for ivermectin versus placebo ..... 14**

**eFigure 2B. All-cause hospitalization, urgent care, emergency room visit, or death for ivermectin versus placebo ..... 15**

**ACTIV-6 Executive Committee**

Adrian Hernandez, Duke Clinical Research Institute (Clinical Coordinating Center PI)  
Susanna Naggie, Duke Clinical Research Institute (Clinical Coordinating Center Co-PI)  
G. Michael Felker, Duke Clinical Research Institute (Medical Monitor, blinded)  
Sybil Wilson, Duke Clinical Research Institute  
Allison DeLong, Duke Clinical Research Institute  
April Remaly, Duke Clinical Research Institute  
Rhonda Wilder, Duke Clinical Research Institute  
Christopher J. Lindsell, Vanderbilt University Medical Center (Data Coordinating Center PI)  
Thomas G. Stewart, Vanderbilt University Medical Center  
Sean Collins, Vanderbilt University Medical Center  
Sarah Dunsmore, National Center for Advancing Translational Sciences  
Sam Bozzette, National Center for Advancing Translational Sciences  
Gene Passamani, National Center for Advancing Translational Sciences  
Stacey Adam, Foundation for the National Institutes of Health  
David Boulware, University of Minnesota  
Elizabeth Shenkman, University of Florida  
Florence Thicklin, Stakeholder Advisory Committee  
Matthew William McCarthy, Weill Cornell Medicine, Stakeholder Advisory Committee  
George Hanna, Biomedical Advanced Research and Development Authority

**ACTIV-6 Protocol Oversight Committee**

David Boulware, University of Minnesota, POC Co-Chair  
Elizabeth Shenkman, University of Florida, POC Co-Chair  
Adrian Hernandez, Duke Clinical Research Institute (Clinical Coordinating Center PI)  
Susanna Naggie, Duke Clinical Research Institute (Clinical Coordinating Center co-PI)  
G. Michael Felker, Duke Clinical Research Institute (Medical Monitor, blinded)  
Sybil Wilson, Duke Clinical Research Institute  
Allison DeLong, Duke Clinical Research Institute  
April Remaly, Duke Clinical Research Institute  
Rhonda Wilder, Duke Clinical Research Institute  
Christopher J. Lindsell, Vanderbilt University Medical Center (Data Coordinating Center PI)  
Thomas G. Stewart, Vanderbilt University Medical Center

Sean Collins, Vanderbilt University Medical Center  
Sarah Dunsmore, National Center for Advancing Translational Sciences  
Sam Bozzette, National Center for Advancing Translational Sciences  
Gene Passamani, National Center for Advancing Translational Sciences  
Stacey Adam, Foundation for the National Institutes of Health  
Florence Thicklin, Stakeholder Advisory Committee  
Matthew William McCarthy, Weill Cornell Medicine, Stakeholder Advisory Committee  
George Hanna, Biomedical Advanced Research and Development Authority  
Adit Ginde, University of Colorado Denver – Anschutz  
Mario Castro, University of Kansas Medical Center  
Dushyantha Jayaweera, University of Miami  
Mark Sulkowski, John Hopkins University  
Nina Gentile, Lewis Katz School of Medicine at Temple University  
Kathleen McTigue, University of Pittsburgh Medical Center  
Kim Marschhauser, PCORI  
Julia Garcia-Diaz, Ochsner Health

### **ACTIV-6 Clinical Trial Team**

Adrian Hernandez, Duke Clinical Research Institute (Clinical Coordinating Center PI)  
Susanna Naggie, Duke Clinical Research Institute (Clinical Coordinating Center Co-PI)  
G. Michael Felker, Duke Clinical Research Institute (Medical Monitor, blinded)  
Sybil Wilson, Duke Clinical Research Institute  
Allison DeLong, Duke Clinical Research Institute  
April Remaly, Duke Clinical Research Institute  
Rhonda Wilder, Duke Clinical Research Institute  
Christopher J. Lindsell, Vanderbilt University Medical Center (Data Coordinating Center PI)  
Thomas G. Stewart, Vanderbilt University Medical Center

### **ACTIV-6 Independent Data Monitoring Committee**

Voting Members:

Clyde Yancy, Northwestern University Feinberg School of Medicine (Chair)  
Adaora Adimora, University of North Carolina, Chapel Hill (Vice-chair)  
Susan Ellenberg, University of Pennsylvania

Kaleab Abebe, University of Pittsburgh  
Arthur Kim, Massachusetts General Hospital  
John D. Lantos, Children's Mercy Hospital  
Jennifer Silvey-Cason, Participant representative

Statistical Data Analysis Center:

Frank Rockhold, Duke Clinical Research Institute (Lead faculty statistician)  
Sean O'Brien, Duke Clinical Research Institute (Faculty statistician)  
Frank Harrell, Vanderbilt University Medical Center (DCC-SDAC Faculty Liaison)  
Zhen Huang, Duke Clinical Research Institute (Lead statistician)

**ACTIV-6 Clinical Events Classification Committee**

Renato Lopes, (CEC PI)

Faculty Reviewers: W. Schuyler Jones, Antonio Gutierrez, Robert Harrison, David Kong, Robert McGarrah

Fellow Reviewers: Michelle Kelsey, Konstantin Krychtiuk, Vishal Rao

**ACTIV-6 Data Coordinating Center**

David Aamodt, Vanderbilt University Medical Center  
JaMario Ayers, Vanderbilt University Medical Center  
Jess Collins, Vanderbilt University Medical Center  
John Graves, Vanderbilt University Medical Center  
James Grindstaff, Vanderbilt University Medical Center  
Frank Harrell, Vanderbilt University Medical Center (DCC-SDAC Faculty Liaison)  
Jessica Lai, Vanderbilt University Medical Center  
Christopher J. Lindsell, Vanderbilt University Medical Center (Data Coordinating Center PI)  
Itzel Lopez, Vanderbilt University Medical Center  
Jessica Marlin, Vanderbilt University Medical Center  
Alyssa Merkel, Vanderbilt University Medical Center  
Sam Nwosu, Vanderbilt University Medical Center  
Savannah Obregon, Vanderbilt University Medical Center  
Dirk Orozco, Vanderbilt University Medical Center  
Yoli Perez-Torres, Vanderbilt University Medical Center

Nelson Prato, Vanderbilt University Medical Center  
Colleen Ratcliff, Vanderbilt University Medical Center  
Max Rohde, Vanderbilt University Medical Center  
Russell Rothman, Vanderbilt University Medical Center  
Jana Shirey-Rice, Vanderbilt University Medical Center  
Krista Vermillion, Vanderbilt University Medical Center  
Thomas Stewart, Vanderbilt University Medical Center (Lead statistician)  
Hsi-nien Tan, Vanderbilt University Medical Center  
Seibert Tregoning, Vanderbilt University Medical Center  
Meghan Vance, Vanderbilt University Medical Center  
Amber Vongsamphanh, Vanderbilt University Medical Center  
Maria Weir, Vanderbilt University Medical Center  
Nicole Zaleski, Vanderbilt University Medical Center

## **ACTIV-6 Primary Site Investigators / Study Coordinators**

**A New Start II, LLC:** William (Kelly) Vincent / Raina Vincent. **Advanced Medical Care, Ltd:** Ray Bianchi / Jen Premas. **AMRON Vitality and Wellness Center, LLC:** Diana Cordero-Loperena / Evelyn Rivera. **Ananda Medical Clinic:** Madhu Gupta / Greg Karawan & Carey Ziomek. **Arena Medical Group:** Joseph Arena / Sonaly DeAlmeida. **Assuta Family Medical Group APMC:** Soroush Ramin / Jaya Nataraj. **Boston Medical Center:** Michael Paasche-Orlow / Lori Henault & Katie Waite. **Bucks County Clinical Research:** David Miller / Ginger Brounce. **Christ the King Health Care, P.C.:** Constance George-Adebayo / Adeolu Adebayo. **Clinical Trials Center of Middle Tennessee:** Alex Slandzicki / Jessica Wallan. **Comprehensive Pain Management and Endocrinology:** Claudia Vogel / Sebastian Munoz. **David Kavtaradze MD, Inc.:** David Kavtaradze / Cassandra Watson. **David Singleton MD, PA:** David Singleton / Maria Rivon & Amanda Sevier. **Del Pilar Medical and Urgent Care:** Arnold Del Pilar / Amber Spangler. **DHR Health Institute for Research:** Sohail Rao / Luis Cantu. **Diabetes and Endocrinology Assoc. of Stark County:** Arvind Krishna / Kathy Evans, Tylene Falkner & Brandi Kerr. **Doctors Medical Group of Colorado Springs, P.C.:** Robert Spees / Mailyn Marta. **Duke University:** G. Michael Felker / Amanda Harrington. **Duke University Hospital:** Rowena Dolor / Madison Frazier, Lorraine Vergara & Jessica Wilson. **Elite Family Practice:** Valencia Burruss / Terri Hurst. **Emory University:** Igbo Ofotokun / Laurel Bristow. **Essentia Health:** Rajesh Prabhu / Krystal Klicka & Amber Lightfeather. **Essential Medical Care, Inc.:** Vicki James / Marcella Rogers. **Express Family Clinic:** Pradeep Parihar / De'Ambra Torress. **Family Practice Doctors P.A.:** Chukwuemeka Oragwu / Ngozi Oguego. **First Care Medical Clinic:** Rajesh Pillai / Mustafa Juma. **Focus Clinical Research Solutions:** Ahab Gabriel / Emad Ghaly. **Franciscan Health Michigan City:** Dafer Al-Haddadin / Courtney Ramirez. **G&S Medical Associates, LLC:** Gammal Hassanien / Samah Ismail. **George Washington University Hospital:** Andrew Meltzer / Seamus Moran. **Geriatrics and Medical Associates:** Scott Brehaut / Angelina Roche. **GFC of Southeastern Michigan, PC:** Manisha Mehta / Nicole Koppinger. **Health Quality Primary Care:** Jose Baez / Ivone Pagan. **Highlands Medical Associates, P.A.:** Dallal Abdelsayed / Mina Aziz. **Hoag Memorial Hospital Presbyterian:** Philip Robinson / Julie Nguyen. **Hugo Medical Clinic:** Victoria Pardue / Llisa Hammons. **Innovation Clinical Trials Inc.:** Juan Ruiz-Unger / Susan Gonzalez & Lionel Reyes. **Jackson Memorial Hospital:** John Cienki / Gisselle Jimenez. **Jadestone Clinical Research, LLC:** Jonathan Cohen / Matthew Wong & Ying Yuan. **Jeremy W. Szeto, D.O., P.A.:** Jeremy Szeto. **Johns Hopkins Hospital:** Mark Sulkowski / Lauren Stelmash. **Lakeland Regional Medical Center:** Arch Amon / Daniel Haight. **Lamb Health, LLC:** Deryl Lamb / Amron Harper.

**Lice Source Services Plantation:** Nancy Pyram-Bernard / Arlen Quintero. **Lupus Foundation of Gainesville:** Eftim Adhami. **Maria Medical Center, PLLC:** Josette Maria / Diksha Paudel & Oksana Raymond. **Medical Specialists of Knoxville:** Jeffrey Summers / Tammy Turner. **Medical University of South Carolina:** Leslie Lenert / Sam Gallegos & Elizabeth Ann Szwast. **Mediversity Healthcare:** Ahsan Abdulghani / Pravin Vasoya. **Miller Family Practice, LLC:** Conrad Miller / Hawa Wiley. **North Shore University Health System/Evanston Hospital:** Nirav Shah / Tovah Klein. **Ochsner Clinic Foundation:** Julie Castex / Phillip Feliciano. **Olivo Wellness Medical Center:** Jacqueline Olivo / Marian Ghaly, Zainub Javed & Alexandra Nawrocki. **Pine Ridge Family Medicine Inc.:** Anthony Vecchiarelli / Nikki Vigil. **Premier Health:** Vijaya Cherukuri / Erica Burden. **Rapha Family Wellness:** Dawn Linn / Laura Fisher. **Raritan Bay Primary Care & Cardiology Associates:** Vijay Patel / Praksha Patel & Yuti Patel. **Romancare Health Services:** Leonard Ellison / Jeffrey Harrison. **Spinal Pain and Medical Rehab, PC:** Binod Shah / Sugata Shah. **Stanford University:** Upinder Singh / Julia Donahue & Yasmin Jazayeri. **Sunshine Walk In Clinic:** Anita Gupta / N Chandrasekar & Beth Moritz. **Tabitha B. Fortt, M.D., LLC:** Tabitha Fortt / Anisa Fortt. **Tallahassee Memorial Hospital:** Ingrid Jones-Ince / Alix McKee & Christy Schattinger. **Tampa General Hospital:** Jason Wilson / Brenda Farlow. **Temple University Hospital:** Nina Gentile / Lillian Finlaw. **Texas Health Physicians Group:** Randall Richwine & Tearani Williams / Penny Pazier & Lisa Carson. **Texas Tech University Health Sciences Center in El Paso:** Edward Michelson / Danielle Austin. **The Heart and Medical Center:** Sangeeta Khetpal / Tiffaney Cantrell, Drew Franklin & Karissa Marshall. **Trident Health Center:** Arvind Mahadevan / Madelyn Rosequist. **TriHealth, Inc:** Martin Gnoni / Crystal Daffner. **UF Health Precision Health Research:** Carla VandeWeerd / Mitchell Roberts. **University Diagnostics and Treatment Clinic:** Mark D'Andrea / Mina Aziz. **University Medical Center- New Orleans:** Stephen Lim / Wayne Swink. **University of Cincinnati:** Margaret Powers-Fletcher / Sylvere Mukunzi. **University of Florida Health:** Elizabeth Shenkman / Jamie Hensley & Brittney Manning. **University of Florida-JAX-ASCENT:** Carmen Isache / Jennifer Bowman, Angelique Callaghan-Brown & Taylor Scott. **University of Kansas – Wichita:** Tiffany Schwasinger-Schmidt / Ashlie Cornejo. **University of Miami:** Dushyantha Jayaweera / Maria Almanzar, Letty Ginsburg & Americo Hajaz. **University of Minnesota:** Carolyn Bramante. **University of Missouri – Columbia:** Matthew Robinson / Michelle Seithel. **University of Pittsburgh:** Akira Sekikawa / Emily Klawson. **University of Texas Health Science Center at Houston:** Luis Ostrosky / Virginia Umana. **University of Texas Health Science Center at San Antonio:** Thomas Patterson / Robin Tragus. **University of Virginia Health System:** Patrick Jackson / Caroline Hallowell & Heather Haughey. **Vaidya**

**MD PLLC:** Bhavna Vaidya-Tank / Cameron Gould. **Vanderbilt University Medical Center:** Parul Goyal / Carly Gatewood. **Wake Forest University Health Sciences:** John Williamson / Hannah Seagle. **Weill Cornell Medical College:** Matthew McCarthy / Elizabeth Salsgiver. **Well Pharma Medical Research:** Eddie Armas / Jhonsai Cheng & Priscilla Huerta.



## **COVID-19 Ordinal Outcome Scale**

The COVID-19 outcomes for this trial are based on the World Health Organization's Ordinal Scale for Clinical Improvement and will be collected via the online system and from the medical record. The following outcomes will be assessed as part of the COVID Clinical Progression Scale:

0. No clinical or virological evidence of infection
1. No limitation of activities
2. Limitation of activities
3. Hospitalized, no oxygen therapy
4. Hospitalized, on oxygen by mask or nasal prongs
5. Hospitalized, on non-invasive ventilation or high-flow oxygen
6. Hospitalized, on intubation and mechanical ventilation
7. Hospitalized, on ventilation + additional organ support – pressors, RRT, ECMO
8. Death

**eTable 1. Baseline symptom prevalence and severity**

| <b>Variable</b>                        | <b>Placebo<br/>(N=774)</b> | <b>Active<br/>(N=817)</b> | <b>Overall<br/>(N=1591)</b> |
|----------------------------------------|----------------------------|---------------------------|-----------------------------|
| Symptom burden on study day 1, No. (%) |                            |                           |                             |
| None                                   | 54 (6.98)                  | 55 (6.73)                 | 109 (6.85)                  |
| Mild                                   | 434 (56.07)                | 490 (59.98)               | 924 (58.08)                 |
| Moderate                               | 247 (31.91)                | 221 (27.05)               | 468 (29.42)                 |
| Severe                                 | 39 (5.04)                  | 51 (6.24)                 | 90 (5.66)                   |
| Symptoms on study day 1 <sup>a</sup>   |                            |                           |                             |
| Fatigue, No./total (%)                 |                            |                           |                             |
| None                                   | 65/700 (9.29)              | 61/730 (8.36)             | 126/1430 (8.81)             |
| Mild                                   | 317/700 (45.29)            | 365/730 (50.00)           | 682/1430 (47.69)            |
| Moderate                               | 262/700 (37.43)            | 238/730 (32.60)           | 500/1430 (34.97)            |
| Severe                                 | 56/700 (8.00)              | 66/730 (9.04)             | 122/1430 (8.53)             |
| Dyspnea, No./total (%)                 |                            |                           |                             |
| None                                   | 358/700 (51.14)            | 371/729 (50.89)           | 729/1429 (51.01)            |
| Mild                                   | 255/700 (36.43)            | 271/729 (37.17)           | 526/1429 (36.81)            |
| Moderate                               | 82/700 (11.71)             | 75/729 (10.29)            | 157/1429 (10.99)            |
| Severe                                 | 5/700 (0.71)               | 12/729 (1.65)             | 17/1429 (1.19)              |
| Fever, No./total (%)                   |                            |                           |                             |
| None                                   | 519/700 (74.14)            | 555/729 (76.13)           | 1074/1429 (75.16)           |
| Mild                                   | 140/700 (20.00)            | 126/729 (17.28)           | 266/1429 (18.61)            |
| Moderate                               | 36/700 (5.14)              | 40/729 (5.49)             | 76/1429 (5.32)              |
| Severe                                 | 5/700 (0.71)               | 8/729 (1.10)              | 13/1429 (0.91)              |
| Cough, No./total (%)                   |                            |                           |                             |
| None                                   | 85/700 (12.14)             | 98/729 (13.44)            | 183/1429 (12.81)            |
| Mild                                   | 385/700 (55.00)            | 407/729 (55.83)           | 792/1429 (55.42)            |
| Moderate                               | 200/700 (28.57)            | 184/729 (25.24)           | 384/1429 (26.87)            |
| Severe                                 | 30/700 (4.29)              | 40/729 (5.49)             | 70/1429 (4.90)              |
| Nausea, No./total (%)                  |                            |                           |                             |
| None                                   | 504/700 (72.00)            | 544/729 (74.62)           | 1048/1429 (73.34)           |
| Mild                                   | 143/700 (20.43)            | 136/729 (18.66)           | 279/1429 (19.52)            |
| Moderate                               | 38/700 (5.43)              | 36/729 (4.94)             | 74/1429 (5.18)              |
| Severe                                 | 15/700 (2.14)              | 13/729 (1.78)             | 28/1429 (1.96)              |
| Vomiting, No./total (%)                |                            |                           |                             |
| None                                   | 661/700 (94.43)            | 690/729 (94.65)           | 1351/1429 (94.54)           |
| Mild                                   | 26/700 (3.71)              | 29/729 (3.98)             | 55/1429 (3.85)              |
| Moderate                               | 11/700 (1.57)              | 8/729 (1.10)              | 19/1429 (1.33)              |
| Severe                                 | 2/700 (0.29)               | 2/729 (0.27)              | 4/1429 (0.28)               |
| Diarrhea, No./total (%)                |                            |                           |                             |
| None                                   | 502/700 (71.71)            | 525/729 (72.02)           | 1027/1429 (71.87)           |
| Mild                                   | 160/700 (22.86)            | 136/729 (18.66)           | 296/1429 (20.71)            |
| Moderate                               | 31/700 (4.43)              | 57/729 (7.82)             | 88/1429 (6.16)              |

|                                                    |                 |                 |                  |
|----------------------------------------------------|-----------------|-----------------|------------------|
| Severe                                             | 7/700 (1.00)    | 11/729 (1.51)   | 18/1429 (1.26)   |
| Body aches, No./total (%)                          |                 |                 |                  |
| None                                               | 212/700 (30.29) | 234/729 (32.10) | 446/1429 (31.21) |
| Mild                                               | 304/700 (43.43) | 320/729 (43.90) | 624/1429 (43.67) |
| Moderate                                           | 148/700 (21.14) | 140/729 (19.20) | 288/1429 (20.15) |
| Severe                                             | 36/700 (5.14)   | 35/729 (4.80)   | 71/1429 (4.97)   |
| Sore throat, No./total (%)                         |                 |                 |                  |
| None                                               | 331/700 (47.29) | 392/729 (53.77) | 723/1429 (50.59) |
| Mild                                               | 258/700 (36.86) | 247/729 (33.88) | 505/1429 (35.34) |
| Moderate                                           | 94/700 (13.43)  | 64/729 (8.78)   | 158/1429 (11.06) |
| Severe                                             | 17/700 (2.43)   | 26/729 (3.57)   | 43/1429 (3.01)   |
| Headache, No./total (%)                            |                 |                 |                  |
| None                                               | 254/700 (36.29) | 285/729 (39.09) | 539/1429 (37.72) |
| Mild                                               | 290/700 (41.43) | 296/729 (40.60) | 586/1429 (41.01) |
| Moderate                                           | 123/700 (17.57) | 108/729 (14.81) | 231/1429 (16.17) |
| Severe                                             | 33/700 (4.71)   | 40/729 (5.49)   | 73/1429 (5.11)   |
| Chills, No./total (%)                              |                 |                 |                  |
| None                                               | 471/700 (67.29) | 513/729 (70.37) | 984/1429 (68.86) |
| Mild                                               | 165/700 (23.57) | 162/729 (22.22) | 327/1429 (22.88) |
| Moderate                                           | 55/700 (7.86)   | 40/729 (5.49)   | 95/1429 (6.65)   |
| Severe                                             | 9/700 (1.29)    | 14/729 (1.92)   | 23/1429 (1.61)   |
| Nasal symptoms, No./total (%)                      |                 |                 |                  |
| None                                               | 194/700 (27.71) | 210/729 (28.81) | 404/1429 (28.27) |
| Mild                                               | 356/700 (50.86) | 377/729 (51.71) | 733/1429 (51.29) |
| Moderate                                           | 128/700 (18.29) | 121/729 (16.60) | 249/1429 (17.42) |
| Severe                                             | 22/700 (3.14)   | 21/729 (2.88)   | 43/1429 (3.01)   |
| New loss of sense of taste or smell, No./total (%) |                 |                 |                  |
| None                                               | 358/700 (51.14) | 366/729 (50.21) | 724/1429 (50.66) |
| Mild                                               | 158/700 (22.57) | 160/729 (21.95) | 318/1429 (22.25) |
| Moderate                                           | 81/700 (11.57)  | 93/729 (12.76)  | 174/1429 (12.18) |
| Severe                                             | 103/700 (14.71) | 110/729 (15.09) | 213/1429 (14.91) |
| Concomitant Medications                            |                 |                 |                  |
| Remdesivir, No. (%)                                | 2 (0.26)        | 2 (0.24)        | 4 (0.25)         |
| Monoclonal antibodies, No. (%)                     | 25 (3.23)       | 22 (2.69)       | 47 (2.95)        |
| Nirmatrelvir/ritonavir (paxlovid), No. (%)         | 1 (0.13)        | 1 (0.12)        | 2 (0.13)         |

<sup>a</sup>Not all participants returned surveys on all days. The denominator reflects the participants who returned their survey on Day 1.

**eTable 2. Adverse events**

| Adverse Events                                       | Ivermectin,<br>not taken<br>(N=41) | Ivermectin,<br>taken<br>(N=776) | Placebo,<br>not taken<br>(N=50) | Placebo,<br>taken<br>(N=724) | Overall<br>(N=1591) |
|------------------------------------------------------|------------------------------------|---------------------------------|---------------------------------|------------------------------|---------------------|
| Experienced any adverse event, No. (%)               | 1 (2.44)                           | 24 (3.09)                       | 0 (0.00)                        | 27 (3.73)                    | 52 (3.27)           |
| Experienced a serious adverse event, No. (%)         | 1 (2.44)                           | 9 (1.16)                        | 0 (0.00)                        | 9 (1.24)                     | 19 (1.19)           |
| Serious adverse events, No. (not mutually exclusive) |                                    |                                 |                                 |                              |                     |
| COVID-19 pneumonia                                   | 0                                  | 4                               |                                 | 4                            | 8                   |
| Pulmonary embolism                                   | 0                                  | 1                               |                                 | 3                            | 4                   |
| COVID-19 pneumonia aggravated                        | 0                                  | 1                               |                                 | 3                            | 4                   |
| Venous thromboembolism                               | 0                                  | 0                               |                                 | 2                            | 2                   |
| Bacteremia                                           | 0                                  | 0                               |                                 | 1                            | 1                   |
| Diplopia                                             | 0                                  | 0                               |                                 | 1                            | 1                   |
| Pneumonia due to <i>Staphylococcus</i>               | 0                                  | 1                               |                                 | 0                            | 1                   |
| Pneumonia due to <i>Streptococcus</i> , group b      | 0                                  | 1                               |                                 | 0                            | 1                   |
| Acute kidney injury                                  | 1                                  | 0                               |                                 | 0                            | 1                   |
| Hospitalization with dyspnea                         | 0                                  | 1                               |                                 | 0                            | 1                   |
| Viral bronchopneumonia                               | 0                                  | 1                               |                                 | 0                            | 1                   |
| COVID-19                                             | 0                                  | 1                               |                                 | 0                            | 1                   |

“Taken” refers to the participants who reported taking (or planning to take) the study drug at least once. “Not taken” refers to the participants (if any) who did not report taking the study drug.

eFigure 1. Study flow diagram

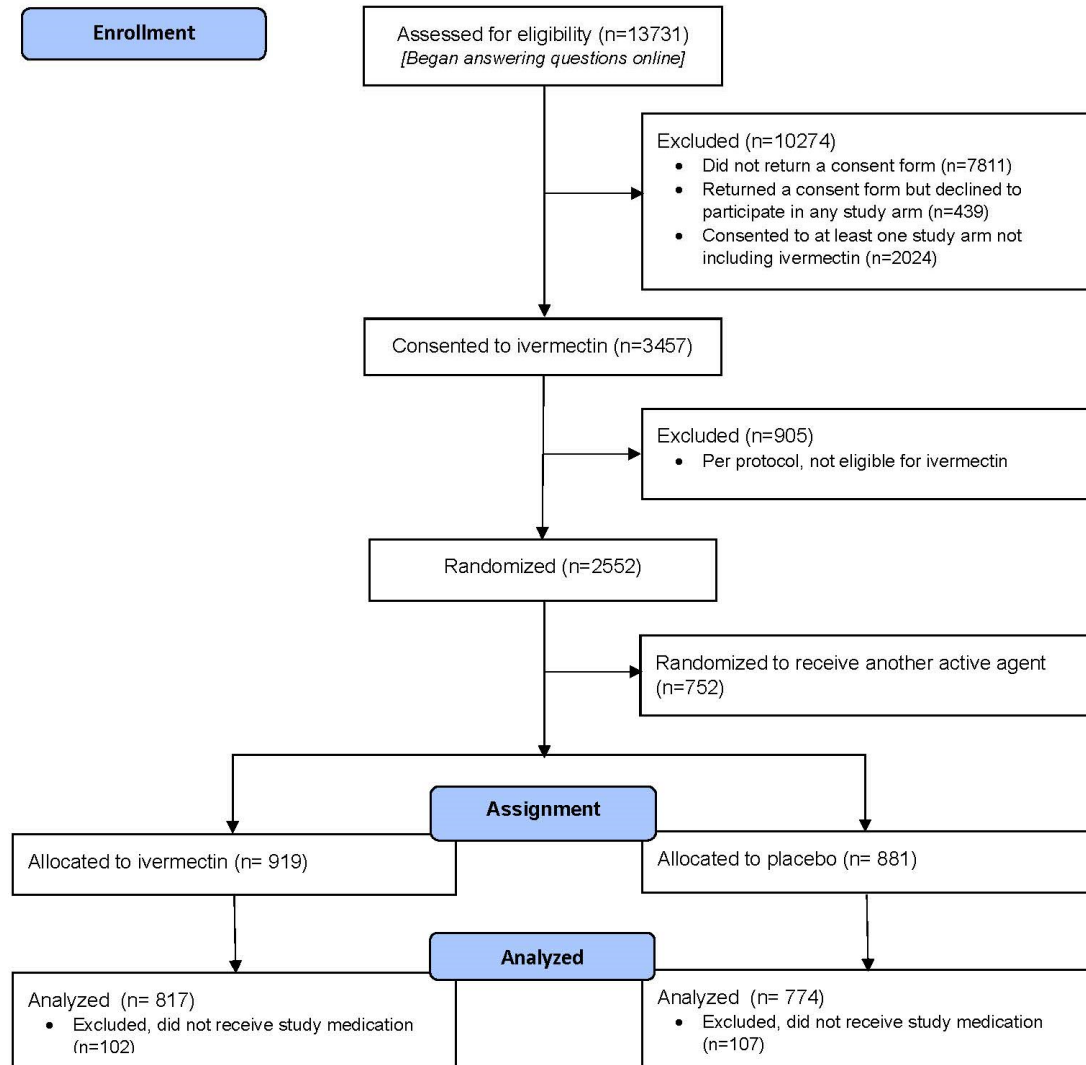

**eFigure 2A. All-cause hospitalization or death for ivermectin versus placebo**

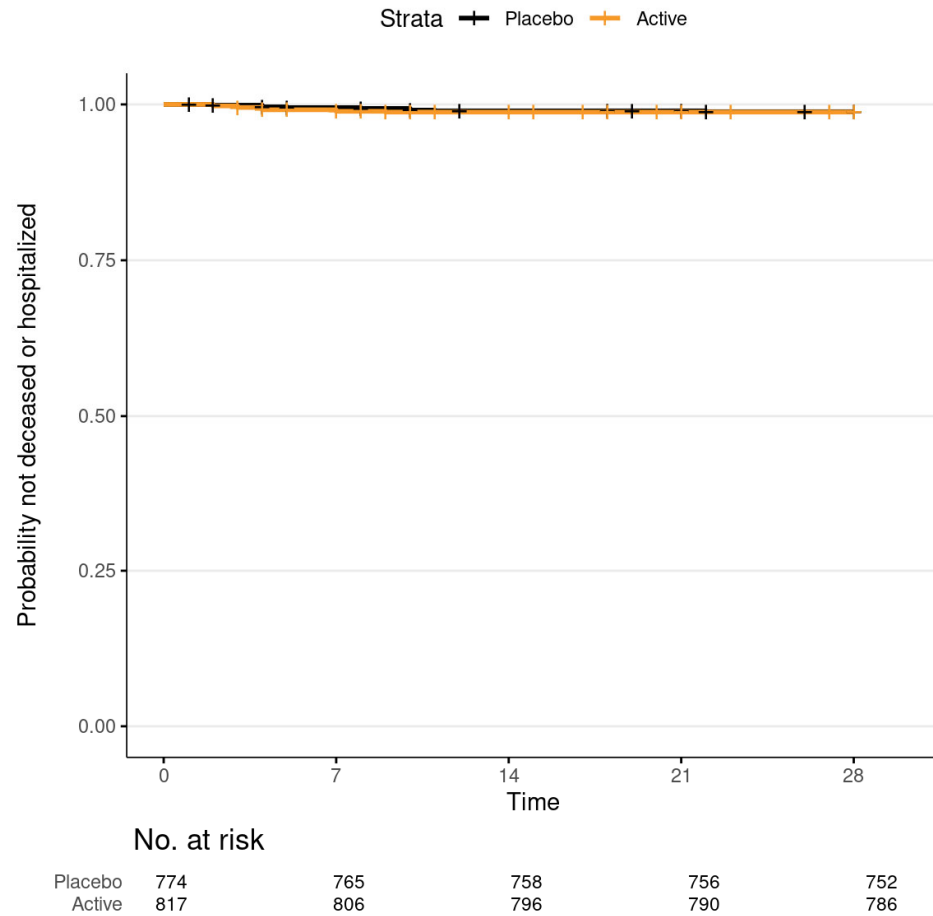

Kaplan-Meier curve and 95% confidence interval (point-wise) for hospitalization or death endpoint. Hospitalization or death was a composite endpoint. Ten hospitalizations occurred with ivermectin (1.22%) as compared to nine hospitalizations with placebo (1.16%). Hospitalization was defined as source documented confirmed hospital admission exceeding 24 hours, as measured from presentation (potentially in the emergency department) to discharge. Time to hospitalization or death was defined as the number of days between receipt of study drug and hospitalization or death (whichever occurred first). The endpoint was administratively censored at 28 days.

**eFigure 2B. All-cause hospitalization, urgent care, emergency room visit, or death for ivermectin versus placebo**

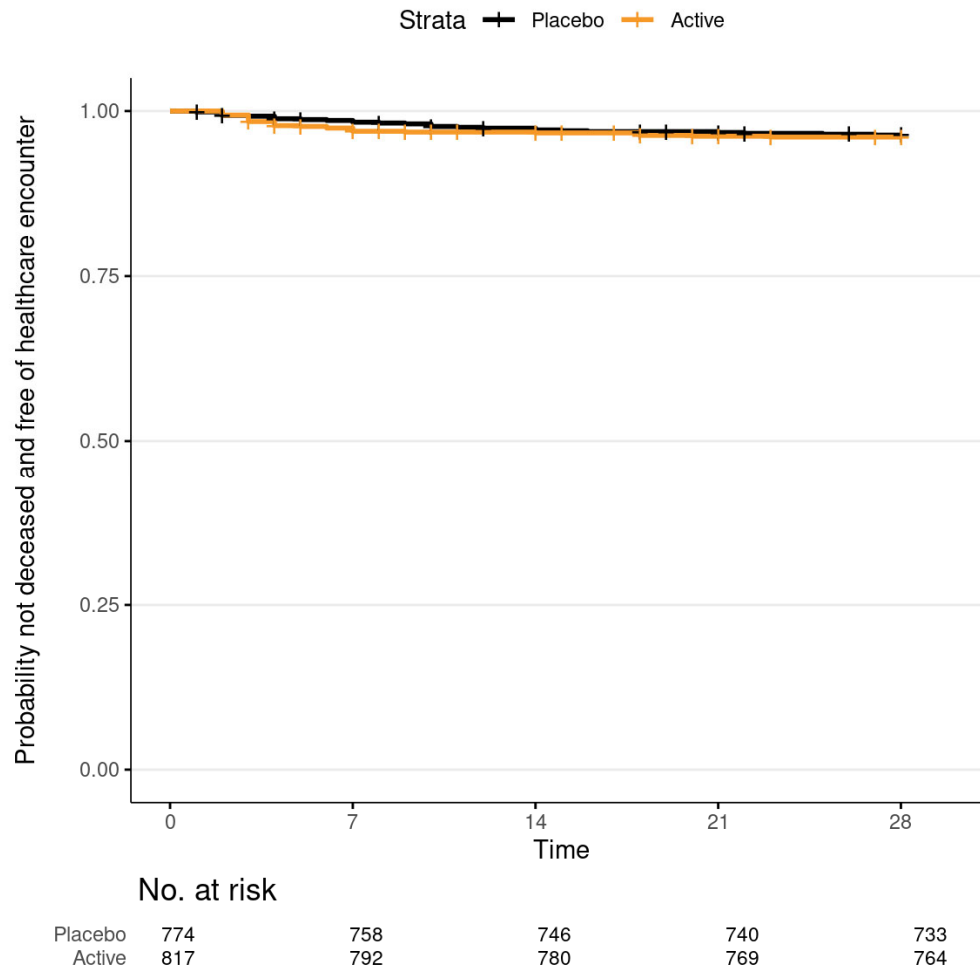

Kaplan-Meier curve and 95% confidence interval (point-wise) for healthcare encounter or death endpoint, which was a composite endpoint. Healthcare encounter was defined as a patient-reported hospitalization, urgent care visit, or emergency department visit of any duration. Healthcare encounters occurred in 32 (3.9%) ivermectin participants and 28 (3.6%) placebo participants. Time to healthcare encounter or death was defined as the number of days between receipt of study drug and the first occurrence of the composite endpoint.
